# Supplementary material for: Modeling Commercial Freshwater Turtle Production on US Farms for Pet and Meat Markets
Source: PubMed Central journal article supplement (PMC4583382; doi:10.1371/journal.pone.0139053), 2015-09-25
Supplement: pone.0139053.s001.pdf [file pone.0139053.s001.pdf]

| $h_0^F$ | ADJ     | $H(t)$  | $G_1^F(t)$ | $G_1^M(t)$ | $Y(t)$ | $h_f^{F/M}$ | $A(t)$ |
|---------|---------|---------|------------|------------|--------|-------------|--------|
| 0.7489  | 0.99765 | 198,655 | 1,612      | 531        | 55,005 | 0.1         | 1,470  |
| 0.66496 | 0.99578 | 133,484 | 2,162      | 723        | 55,006 | 0.2         | 2,238  |
| 0.58075 | 0.994   | 93,711  | 2,498      | 828        | 55,005 | 0.3         | 2,697  |
| 0.4962  | 0.99213 | 66,891  | 2,724      | 909        | 55,004 | 0.4         | 3,015  |
| 0.41136 | 0.9903  | 47,597  | 2,887      | 963        | 55,005 | 0.5         | 3,241  |
